# Supplementary material for: MicroRNA Omics Analysis of Camellia sinesis Pollen Tubes in Response to Low-Temperature and Nitric Oxide
Source: MDPI journal article supplement (doi:10.3390/biom11070930), 2021-06-23
Supplement: s1 [file s1]

**Table S1.** Primer sequences information.

| Name          | Primer Sequences (5'–3') |
|---------------|--------------------------|
| miR1429-3p    | GGCACGGGATTGGTATGTT      |
| miR1535a      | TGCTTGGATGGTGTATGTGC     |
| miR4416b      | TTGGAGAGAGAAGACGCTATC    |
| novel_mir_18  | CTTGCAATTGTGGATTTAGGG    |
| miR5293       | TGAAGAATGAAAGGAAGCAAG    |
| miR1873       | CAATTGGTATCAGAGCTCGG     |
| miR5380c      | ATGATGATGAAGATGAACATG    |
| miR396g-3p    | GTTGAAGAAAGTGTGGACA      |
| miR2118-5p    | GTCGATGGAACAATGTAGGCA    |
| novel_mir_37  | AAGGAAGAAGAAGAAGAAG      |
| β-actin-F     | GCCATCTTTGATTGGAATGG     |
| β-actin-R     | GGTGCCACAACCTTGATCTT     |
| TEA031966.1-F | AGCCTTTTCAAGCCCTT        |
| TEA031966.1-R | TGTCTTTTACCATCACTCACC    |
| TEA030352.1-F | GGAAGTATTGTGGGCTGC       |
| TEA030352.1-R | TCCCTGTGAATGTCGGTT       |
| TEA018965.1-F | TAAGACAAGAAACGCCTCA      |
| TEA018965.1-R | CGTACAGTTATCCTCCACATC    |
| TEA022010.1-F | CGCTTCGTCAACCAACCTA      |
| TEA022010.1-R | CCCACAAGATACCGCTCA       |
| TEA000142.1-F | GTGGCTGTTTGTACGGCA       |
| TEA000142.1-R | ATTCTTCATCTACGGACCC      |
| TEA030640.1-F | GAACATCTGGGTTGGAATAG     |
| TEA030640.1-R | GACATCTGAGACAGCCGAC      |
| TEA012727.1-F | GCTATGATGATGTGGGTGG      |
| TEA012727.1-R | GCCTCCTCAAATGCCTTC       |
| TEA022823.1-F | CCAGTTTGGCATAAAGTAA      |
| TEA022823.1-R | TAGAGTCACCCTAAAGAAGAT    |
| TEA022912.1-F | AAATACGGGTCCTGGGC        |
| TEA022912.1-R | ACCTTCAATGGTTTCACGA      |
| TEA005168.1-F | TCCCTTCTCATCATCTCACT     |
| TEA005168.1-R | AATACAATCTCAGCCTCTGG     |
