# Supplementary material for: MicroRNA Omics Analysis of Camellia sinesis Pollen Tubes in Response to Low-Temperature and Nitric Oxide
Source: MDPI journal article supplement (doi:10.3390/biom11070930), 2021-06-23
Supplement: s1 [file s1]

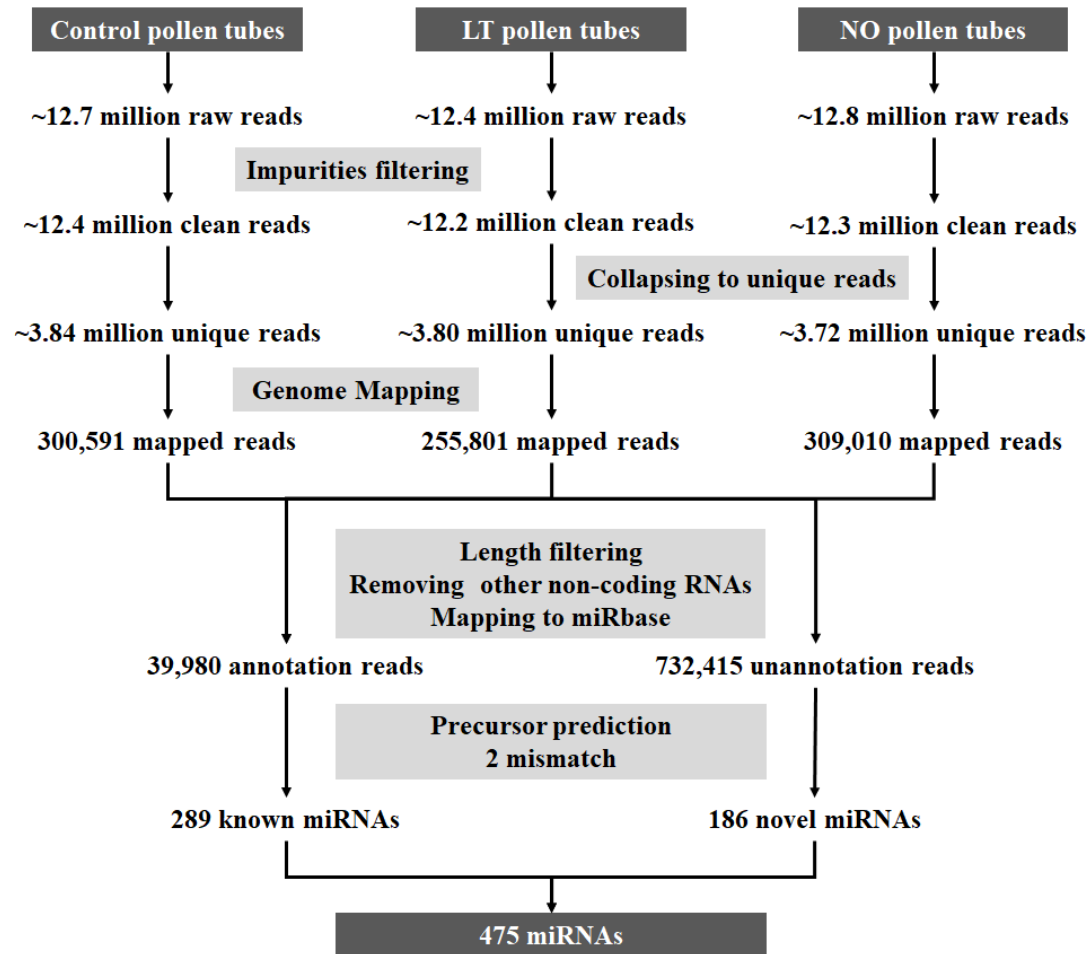

**Figure S1.** Workflow used for annotating miRNAs from tea pollen tubes under control, LT (low-temperature) and NO (nitric oxide) treatments.

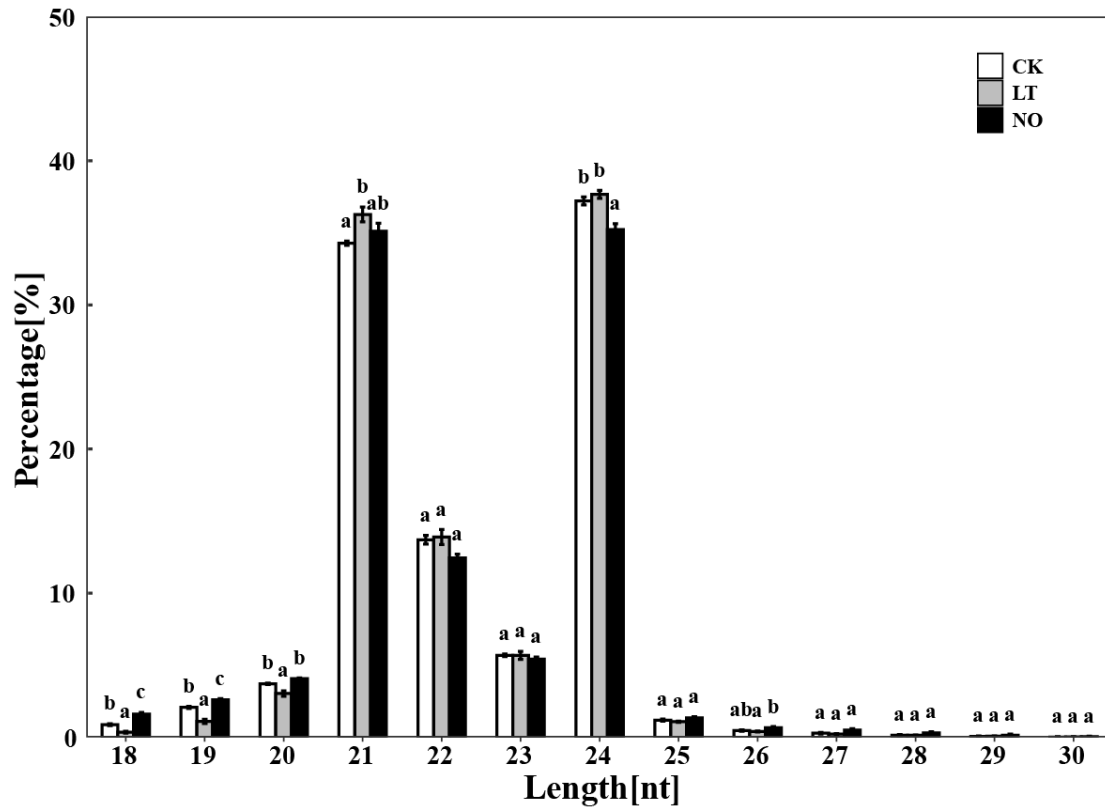

**Figure S2.** Size distribution for microRNAs under LT (low-temperature) and NO (nitric oxide) treatment. Different lowercase indicates significant differences among different treatments in the same length of microRNA at  $P < 0.05$ , as determined by Tukey HSD test.

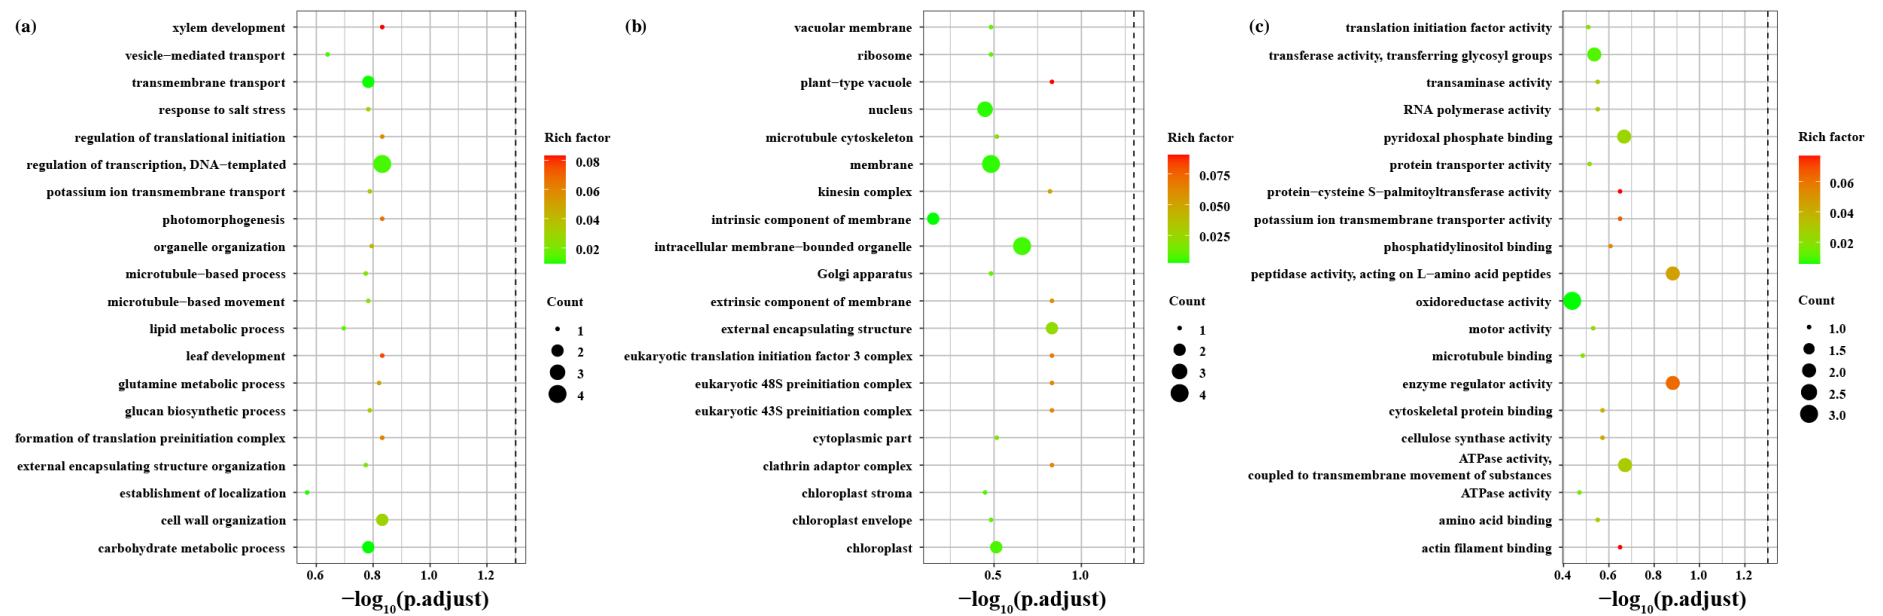

**Figure S3.** Enrichment analysis of gene ontology for the target genes of differentially expressed miRNAs between LT (low-temperature) and CK (control). Biological Process (a); Cellular Component (b); Molecular Function (c). The size of bubbles represents the number of target genes enriched on the GO term. The size of Rich factor represents the enrichment degree of GO term.

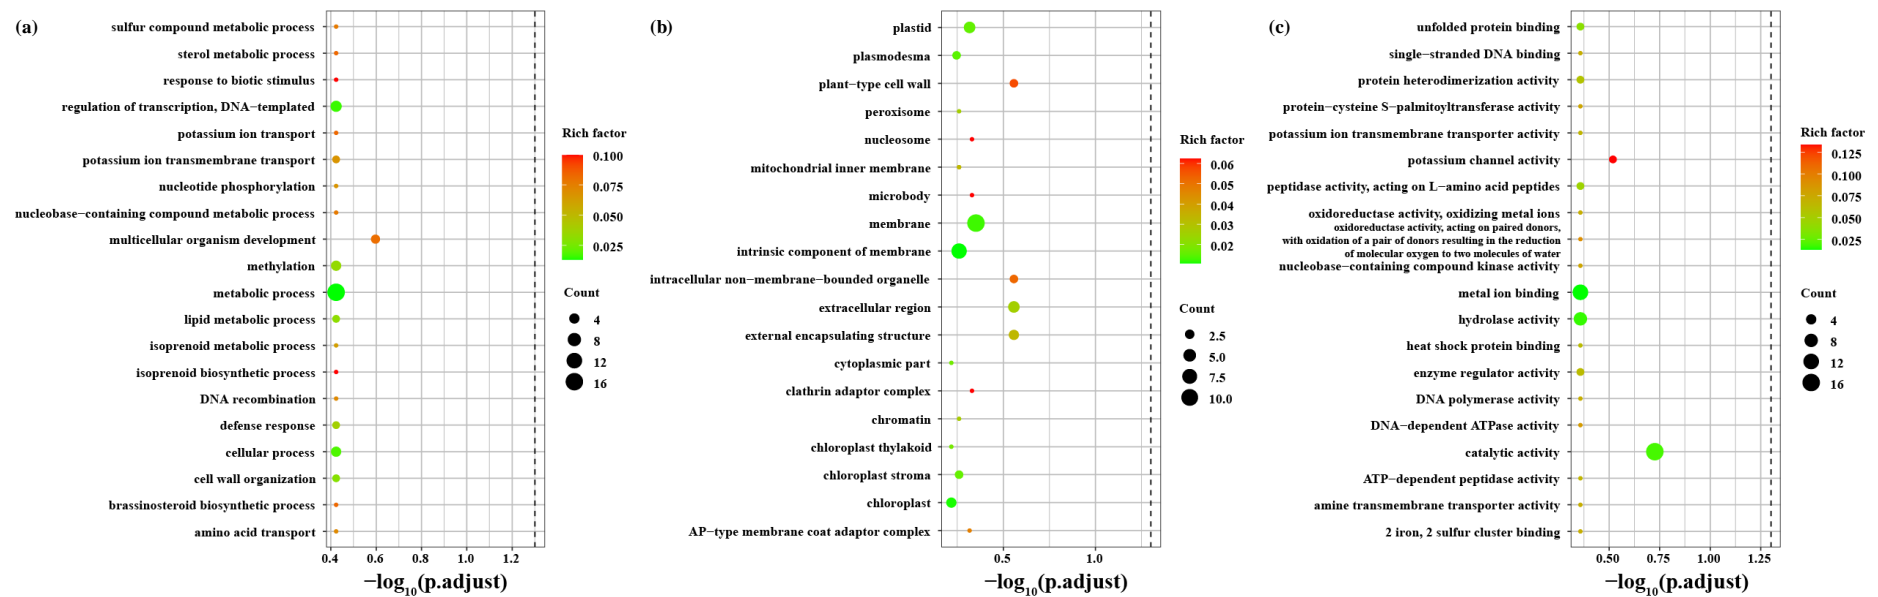

**Figure S4.** Enrichment analysis of gene ontology for the target genes of differentially expressed miRNAs between NO (nitric oxide) and CK (control). Biological Process (a); Cellular Component (b); Molecular Function (c). The size of bubbles represents the number of target genes enriched on the GO term. The size of Rich factor represents the enrichment degree of GO term.

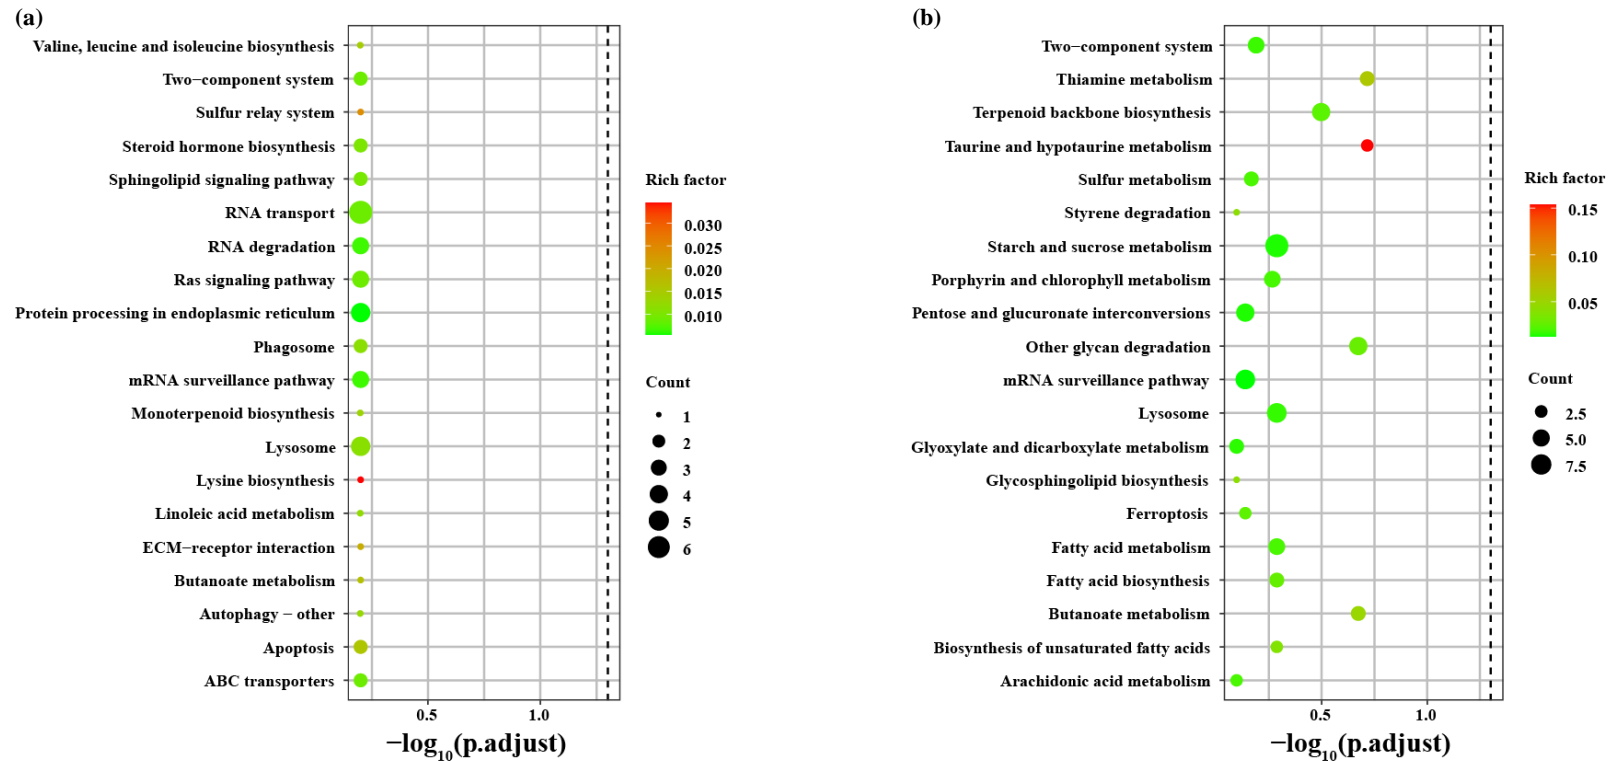

**Figure S5.** KEGG analysis for the target genes of differentially expressed miRNAs. between LT (low-temperature) and CK (control) **(a)**; between NO (nitric oxide) and CK **(b)**. The size of bubbles represents the number of target genes enriched on the KEGG term. The size of Rich factor represents the enrichment degree of KEGG term.
